# Supplementary material
Source: PubMed Central journal article supplement (PMC10961051)

Figure S1

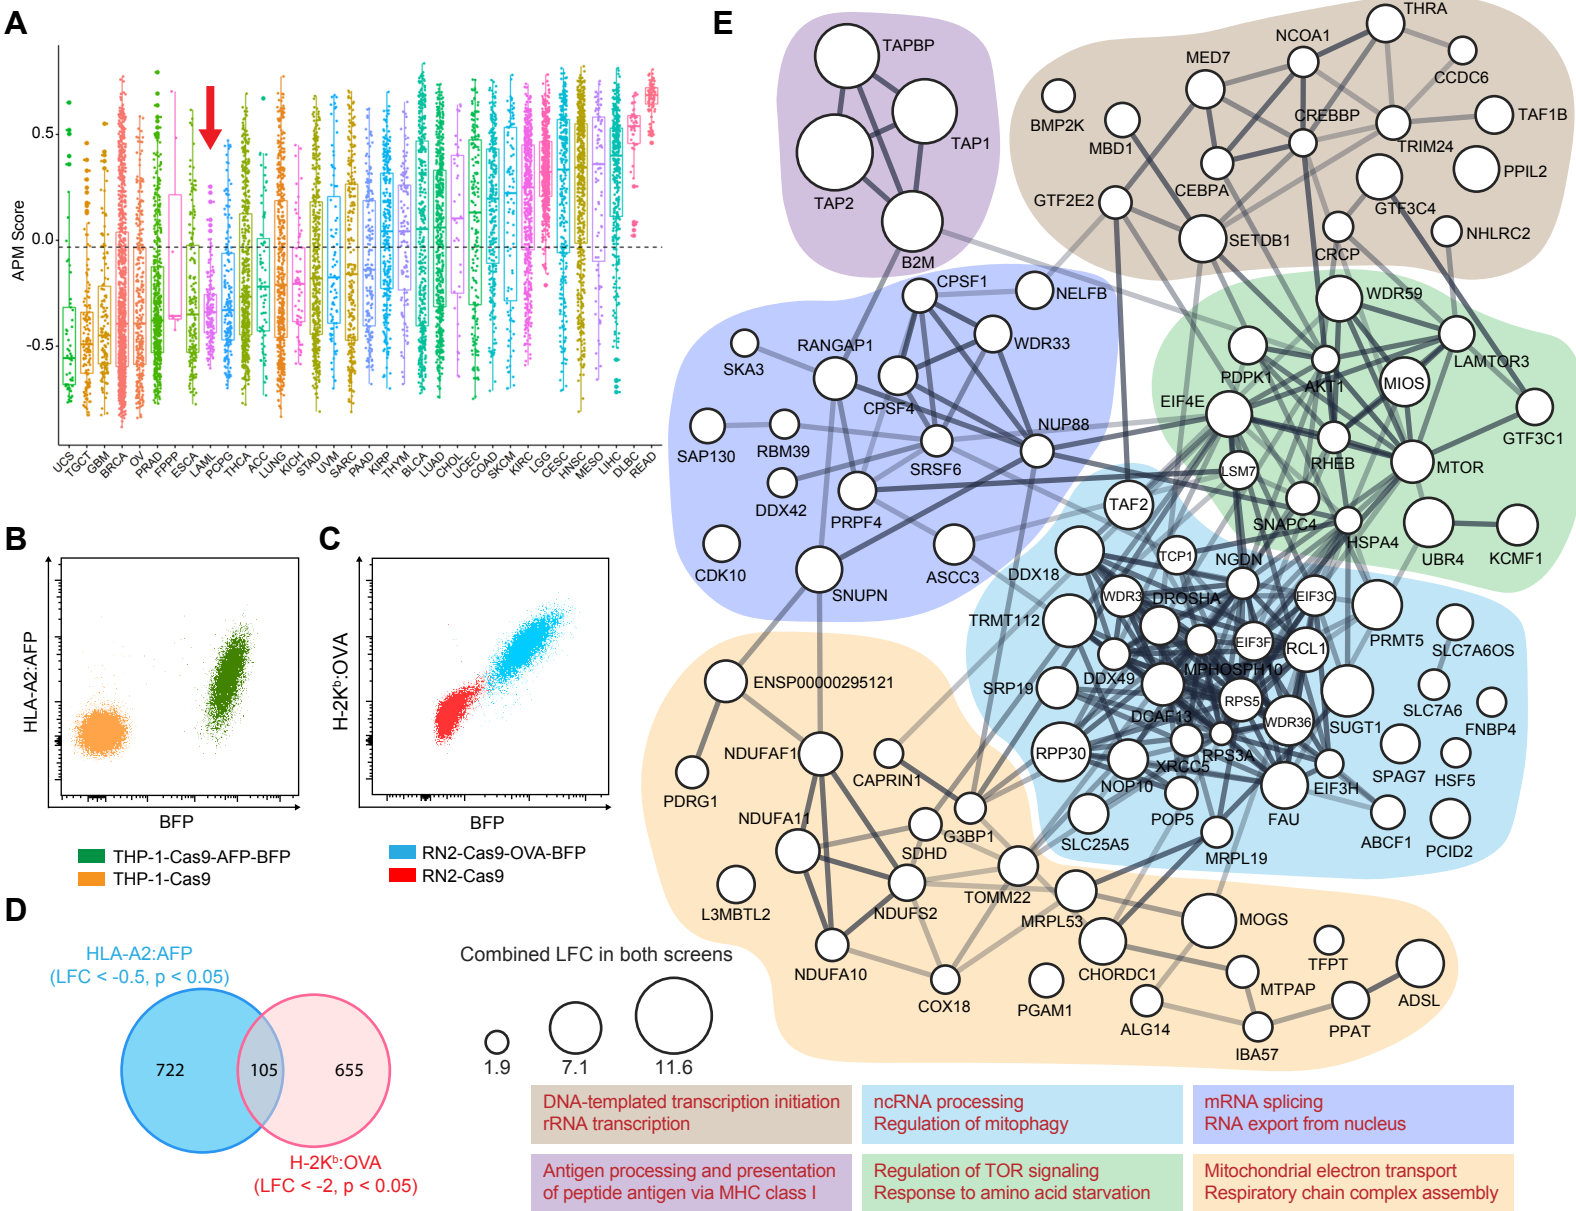

Supplement: NIHMS1965866-supplement-Fig_S1.pdf [file NIHMS1965866-supplement-Fig_S1.pdf]

Figure S2

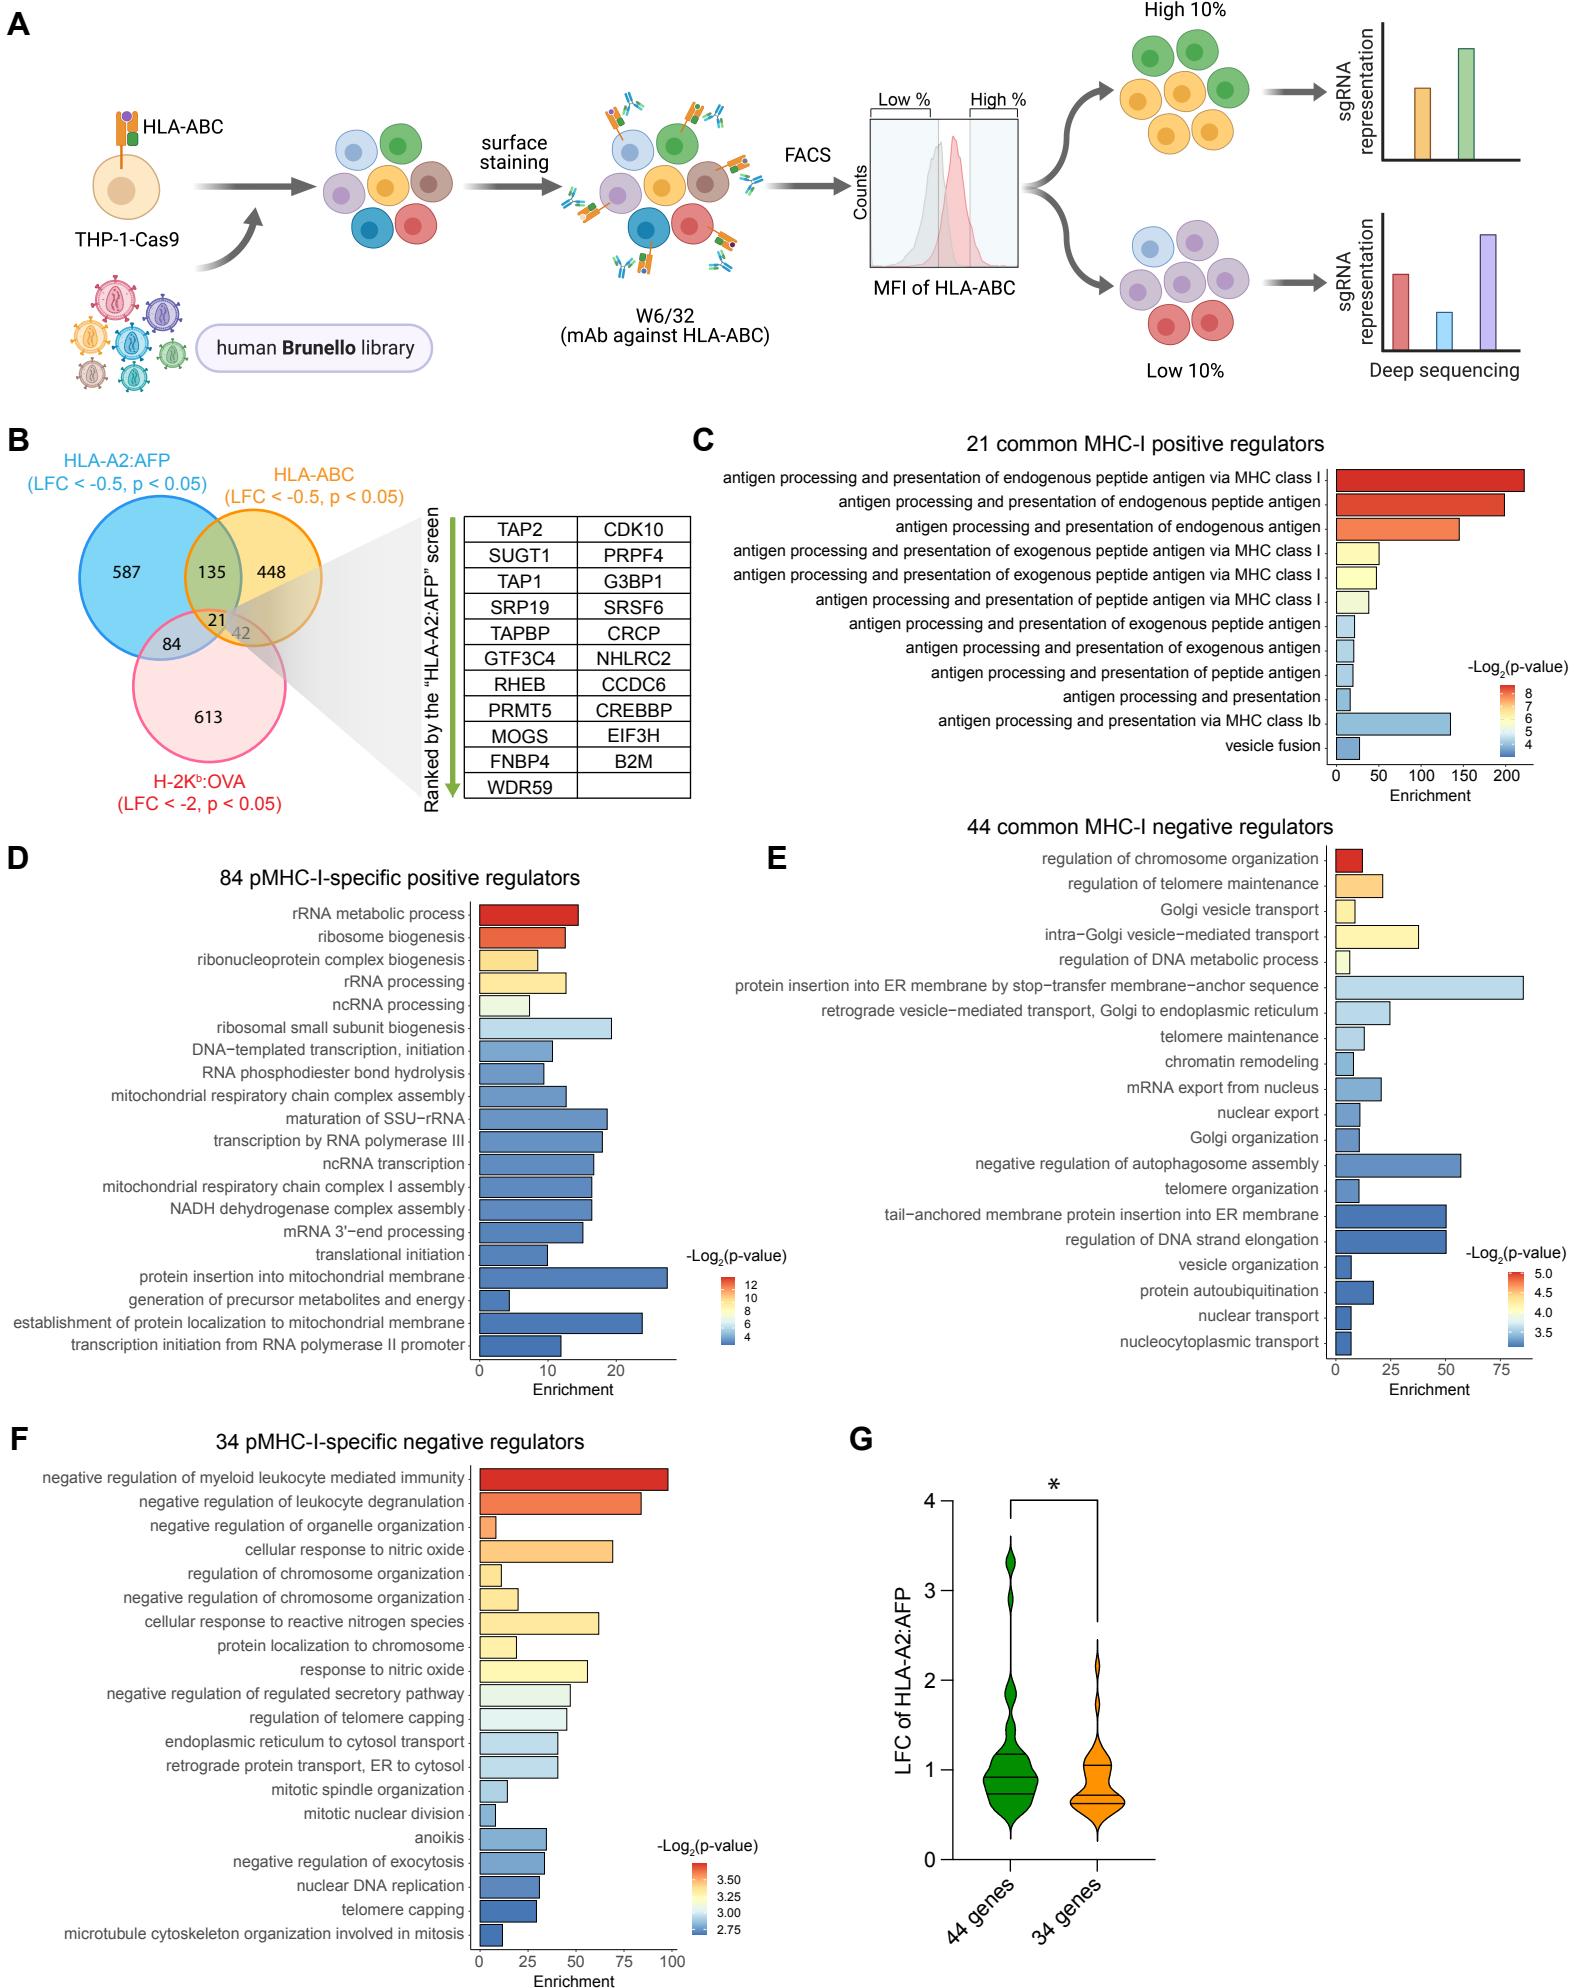

Supplement: NIHMS1965866-supplement-Fig_S2.pdf [file NIHMS1965866-supplement-Fig_S2.pdf]

Figure S3

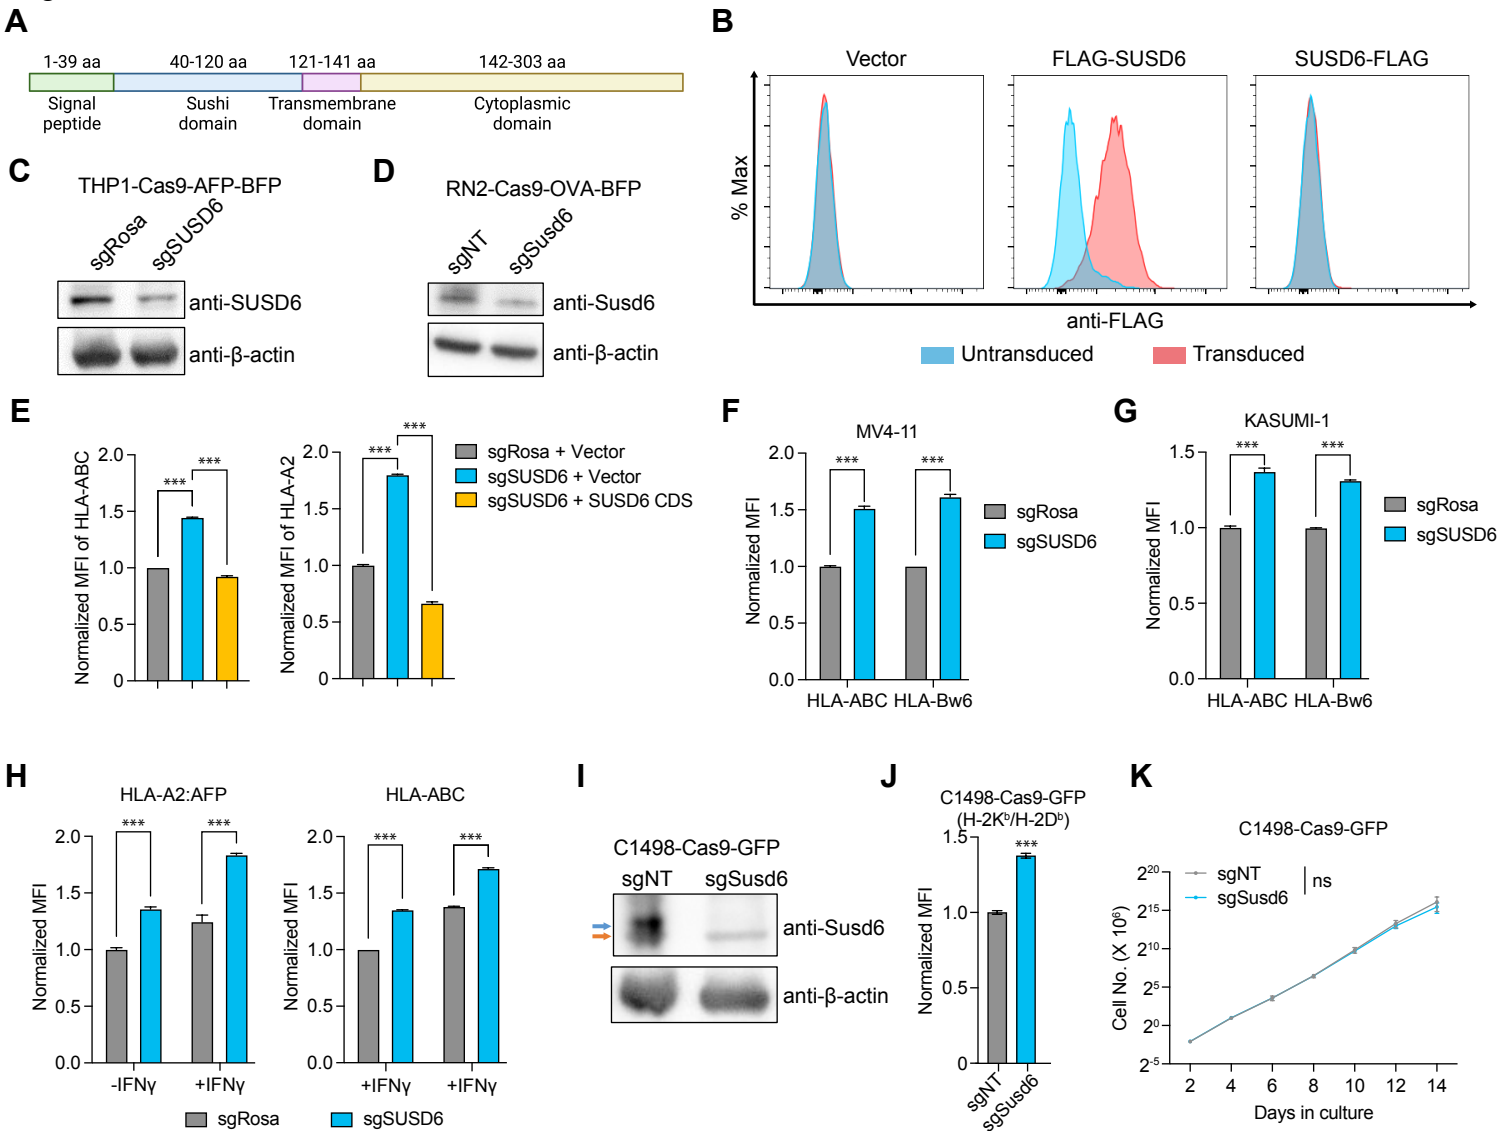

Supplement: NIHMS1965866-supplement-Fig_S3.pdf [file NIHMS1965866-supplement-Fig_S3.pdf]

Figure S4

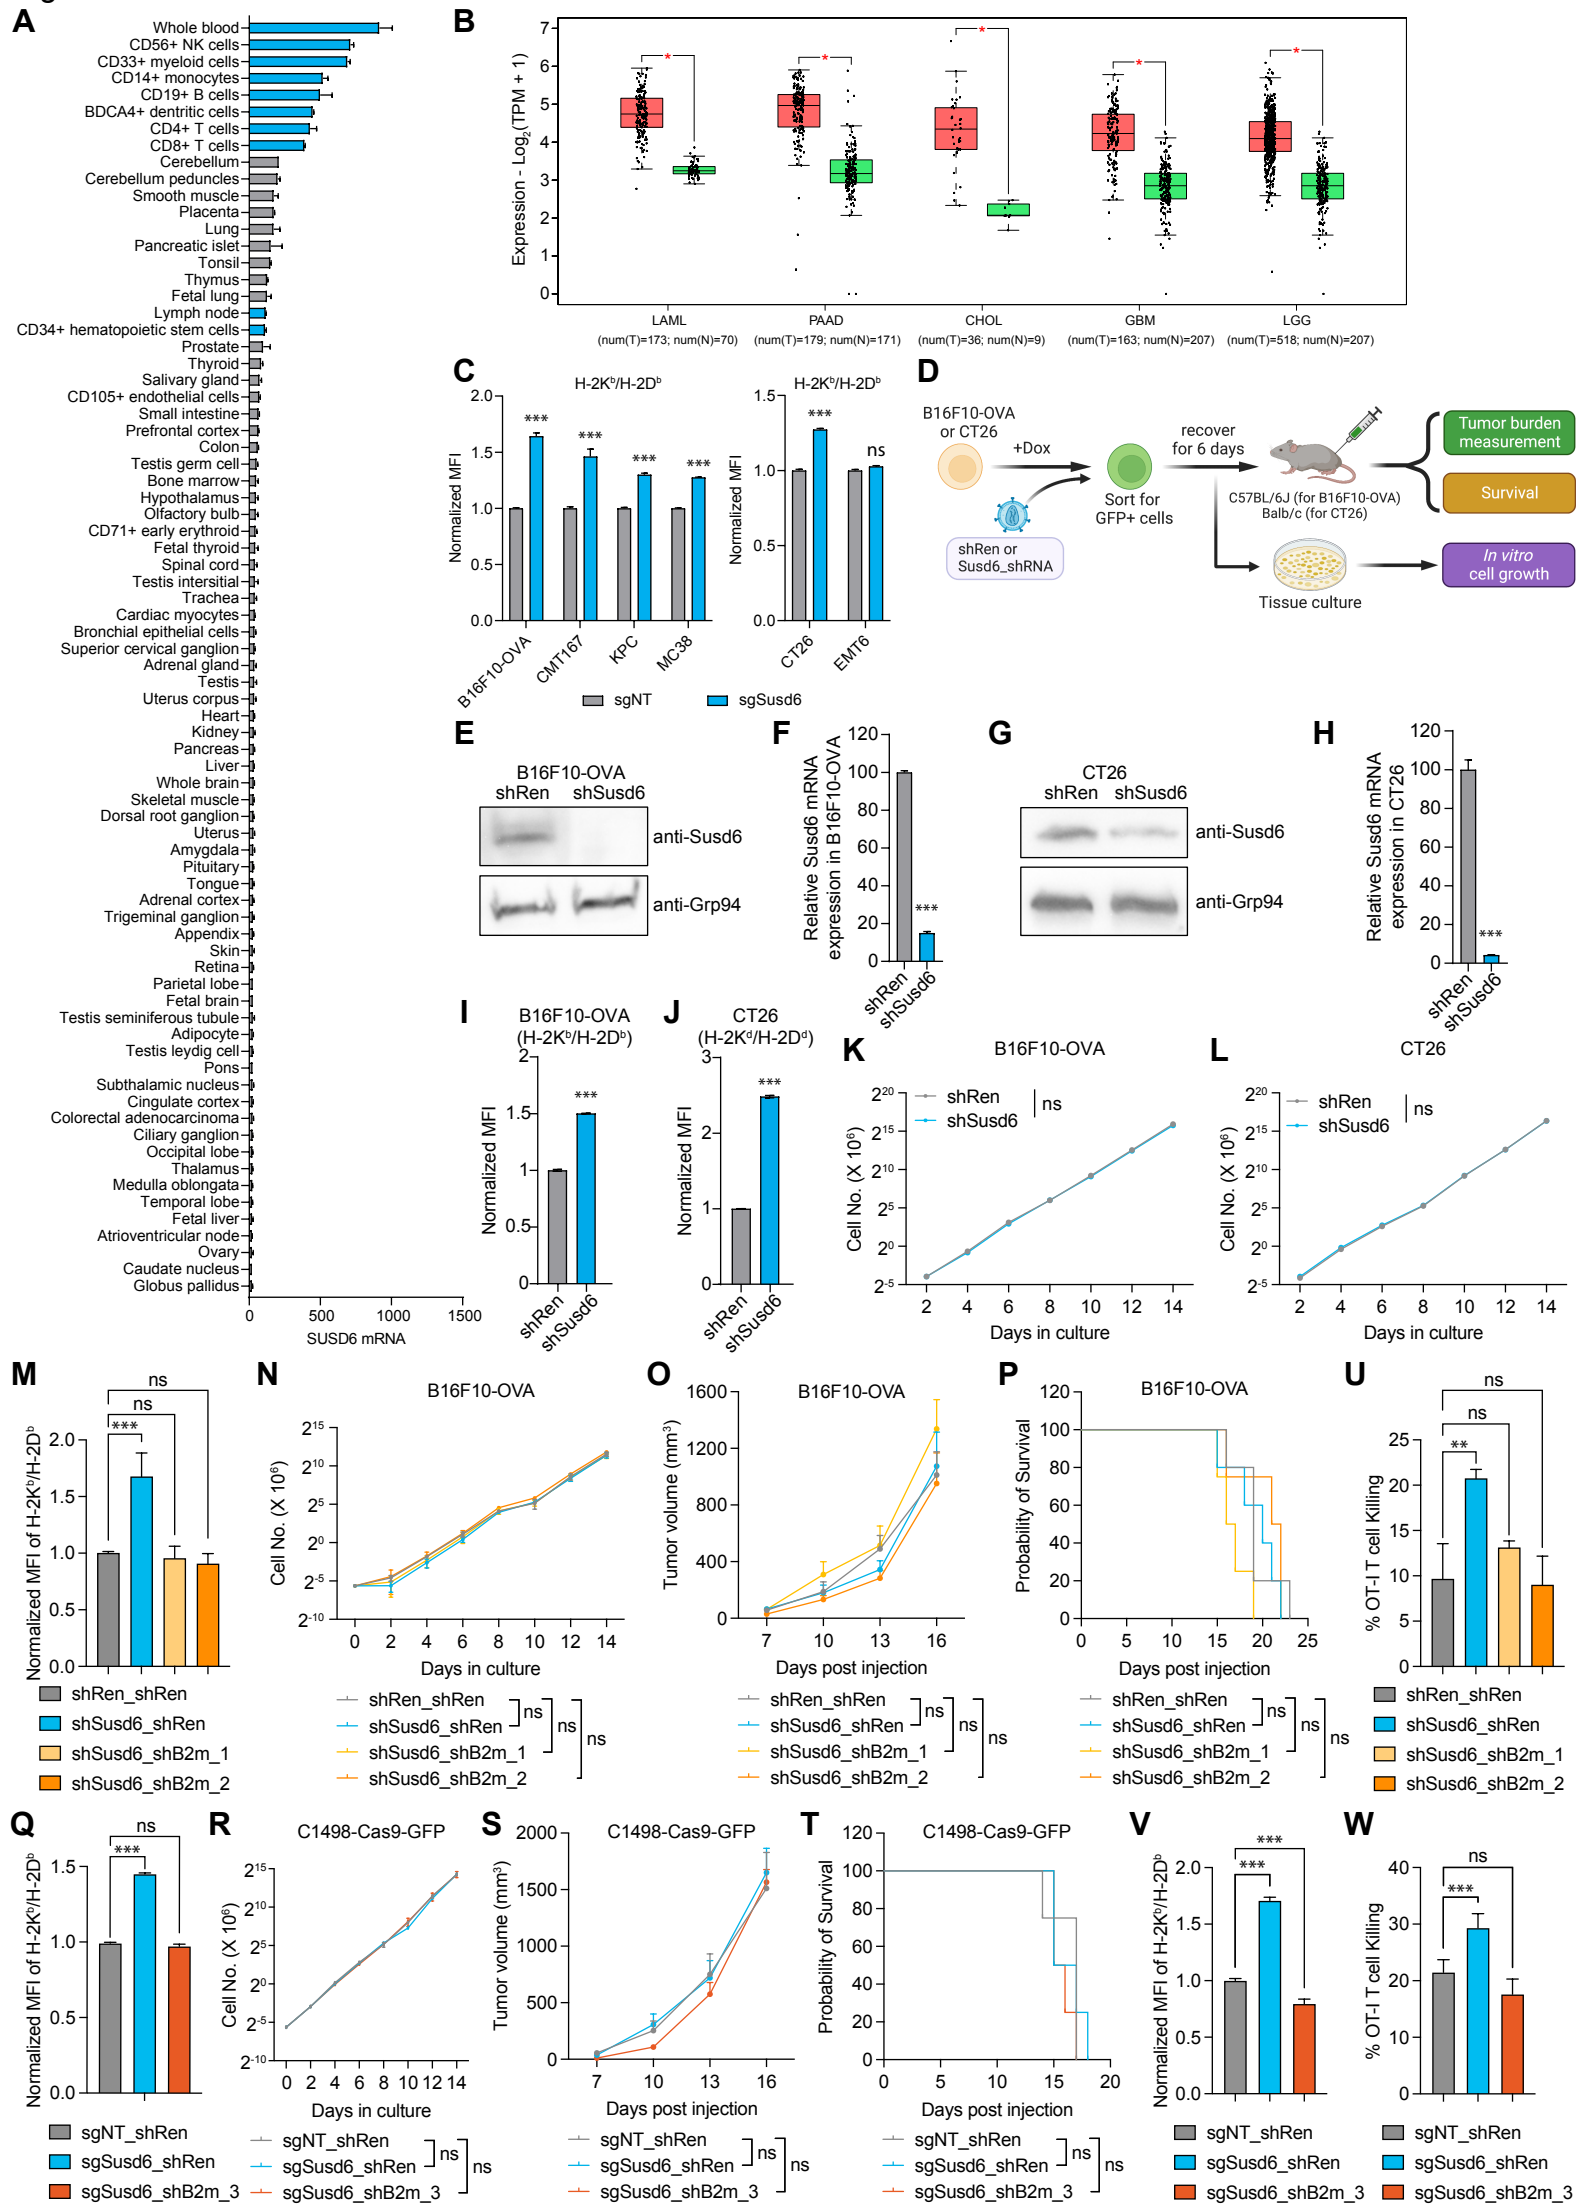

Supplement: NIHMS1965866-supplement-Fig_S4.pdf [file NIHMS1965866-supplement-Fig_S4.pdf]

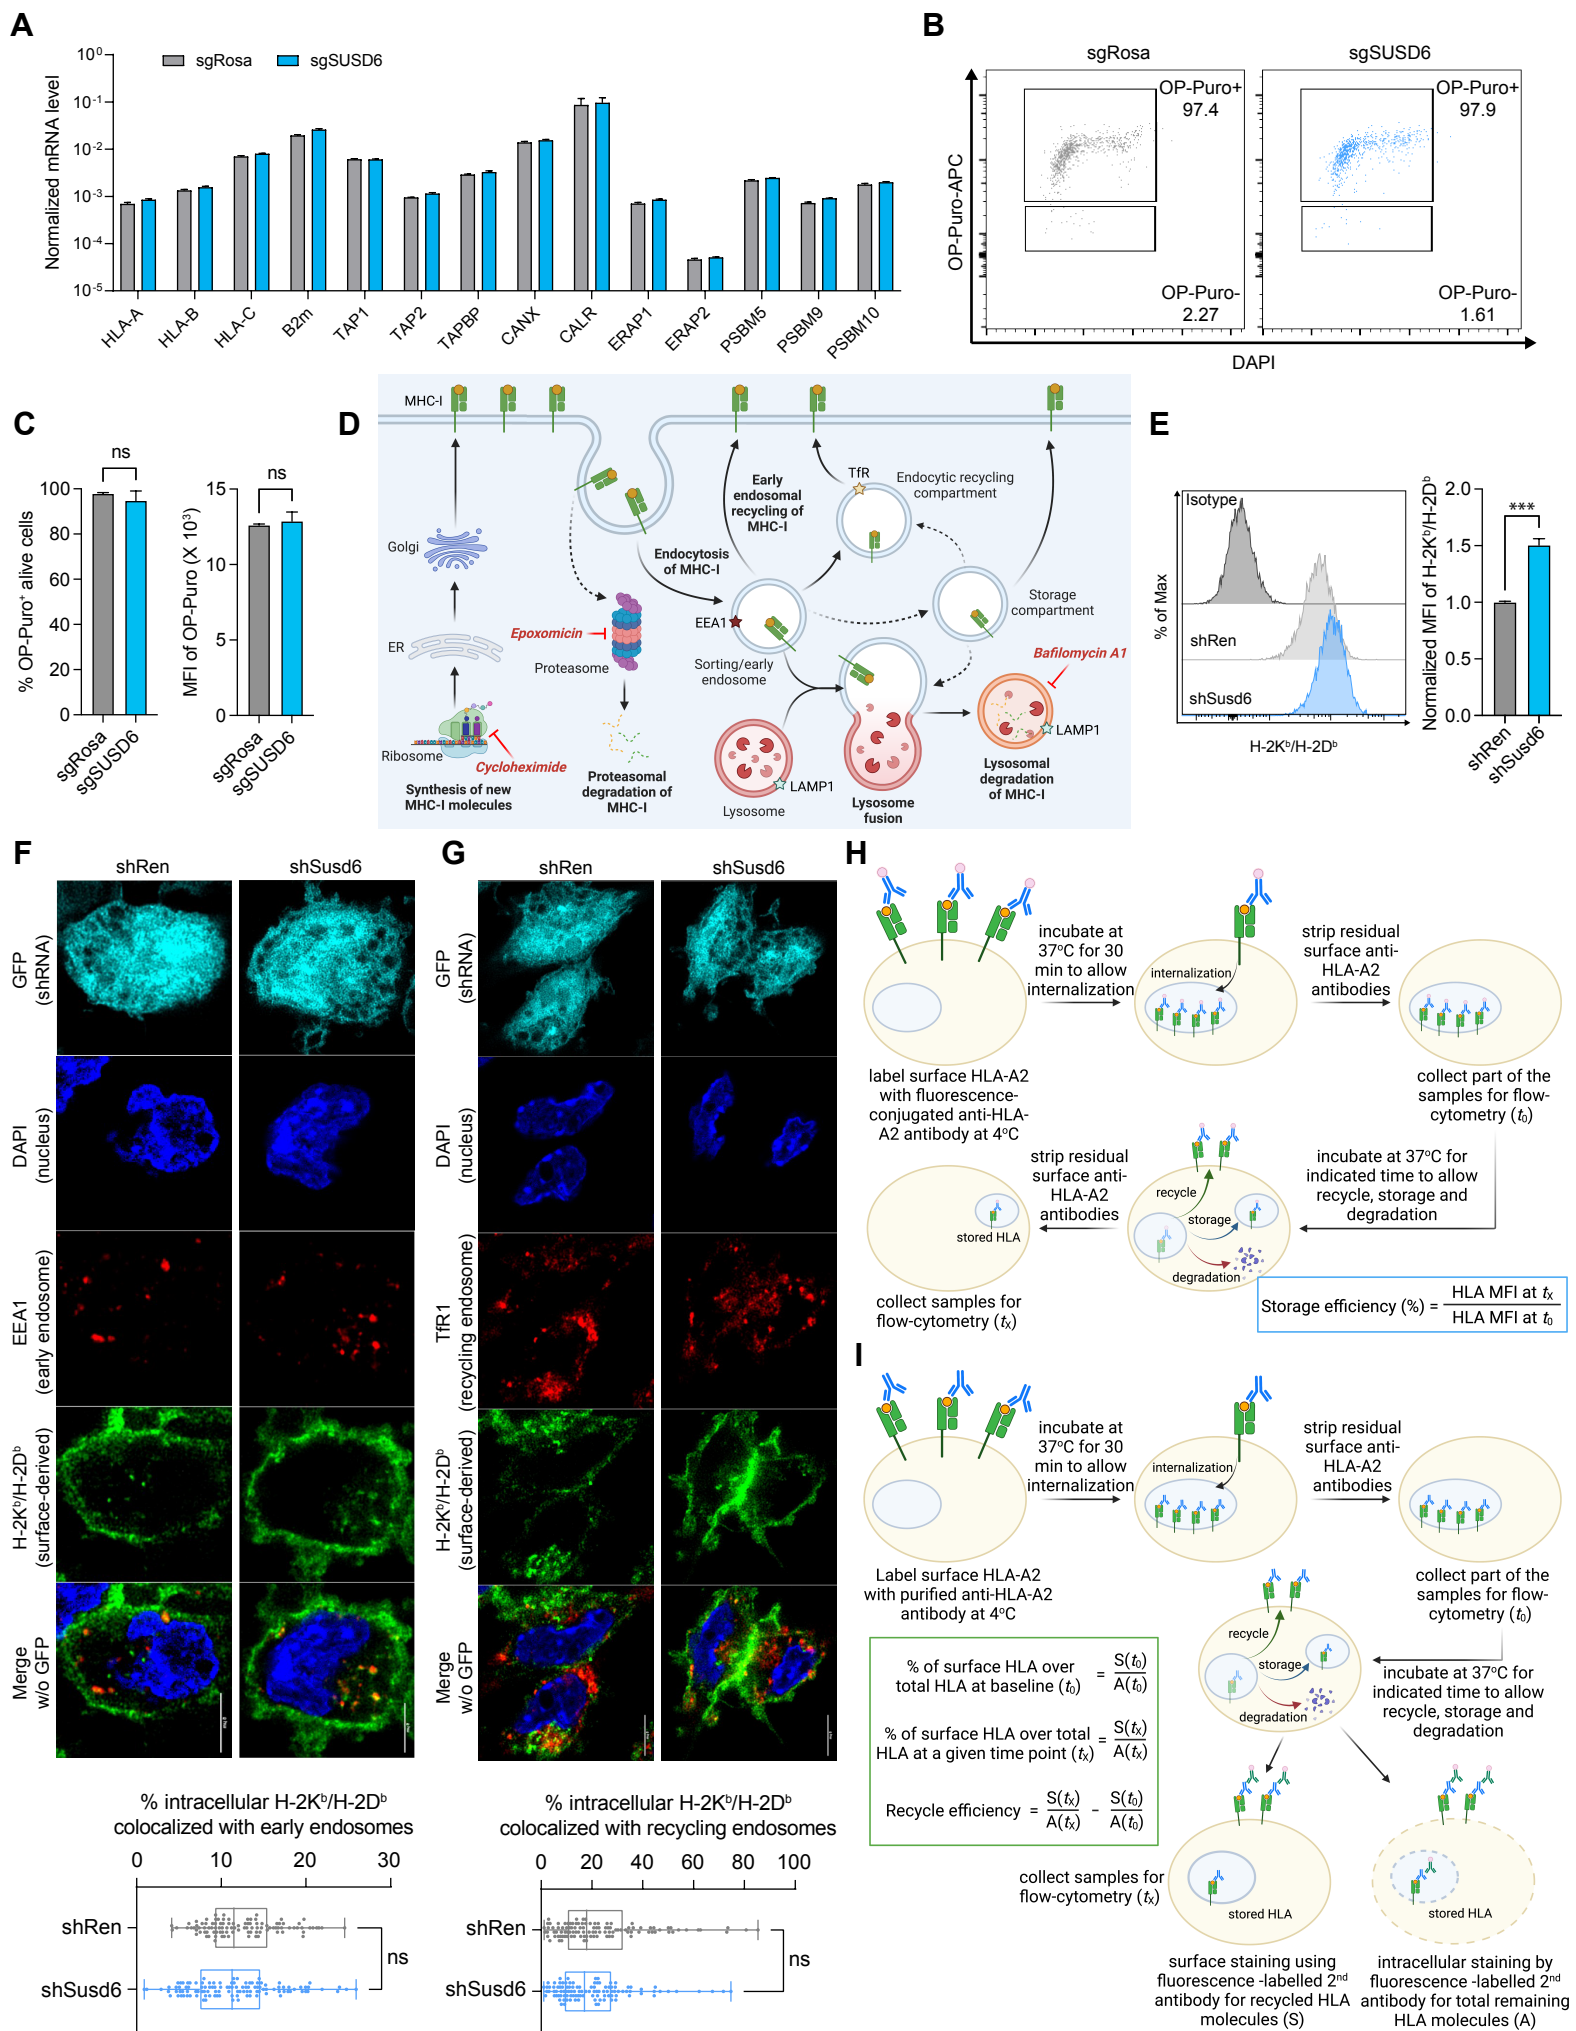

Supplement: NIHMS1965866-supplement-Fig_S5.pdf [file NIHMS1965866-supplement-Fig_S5.pdf]

**Figure S6**

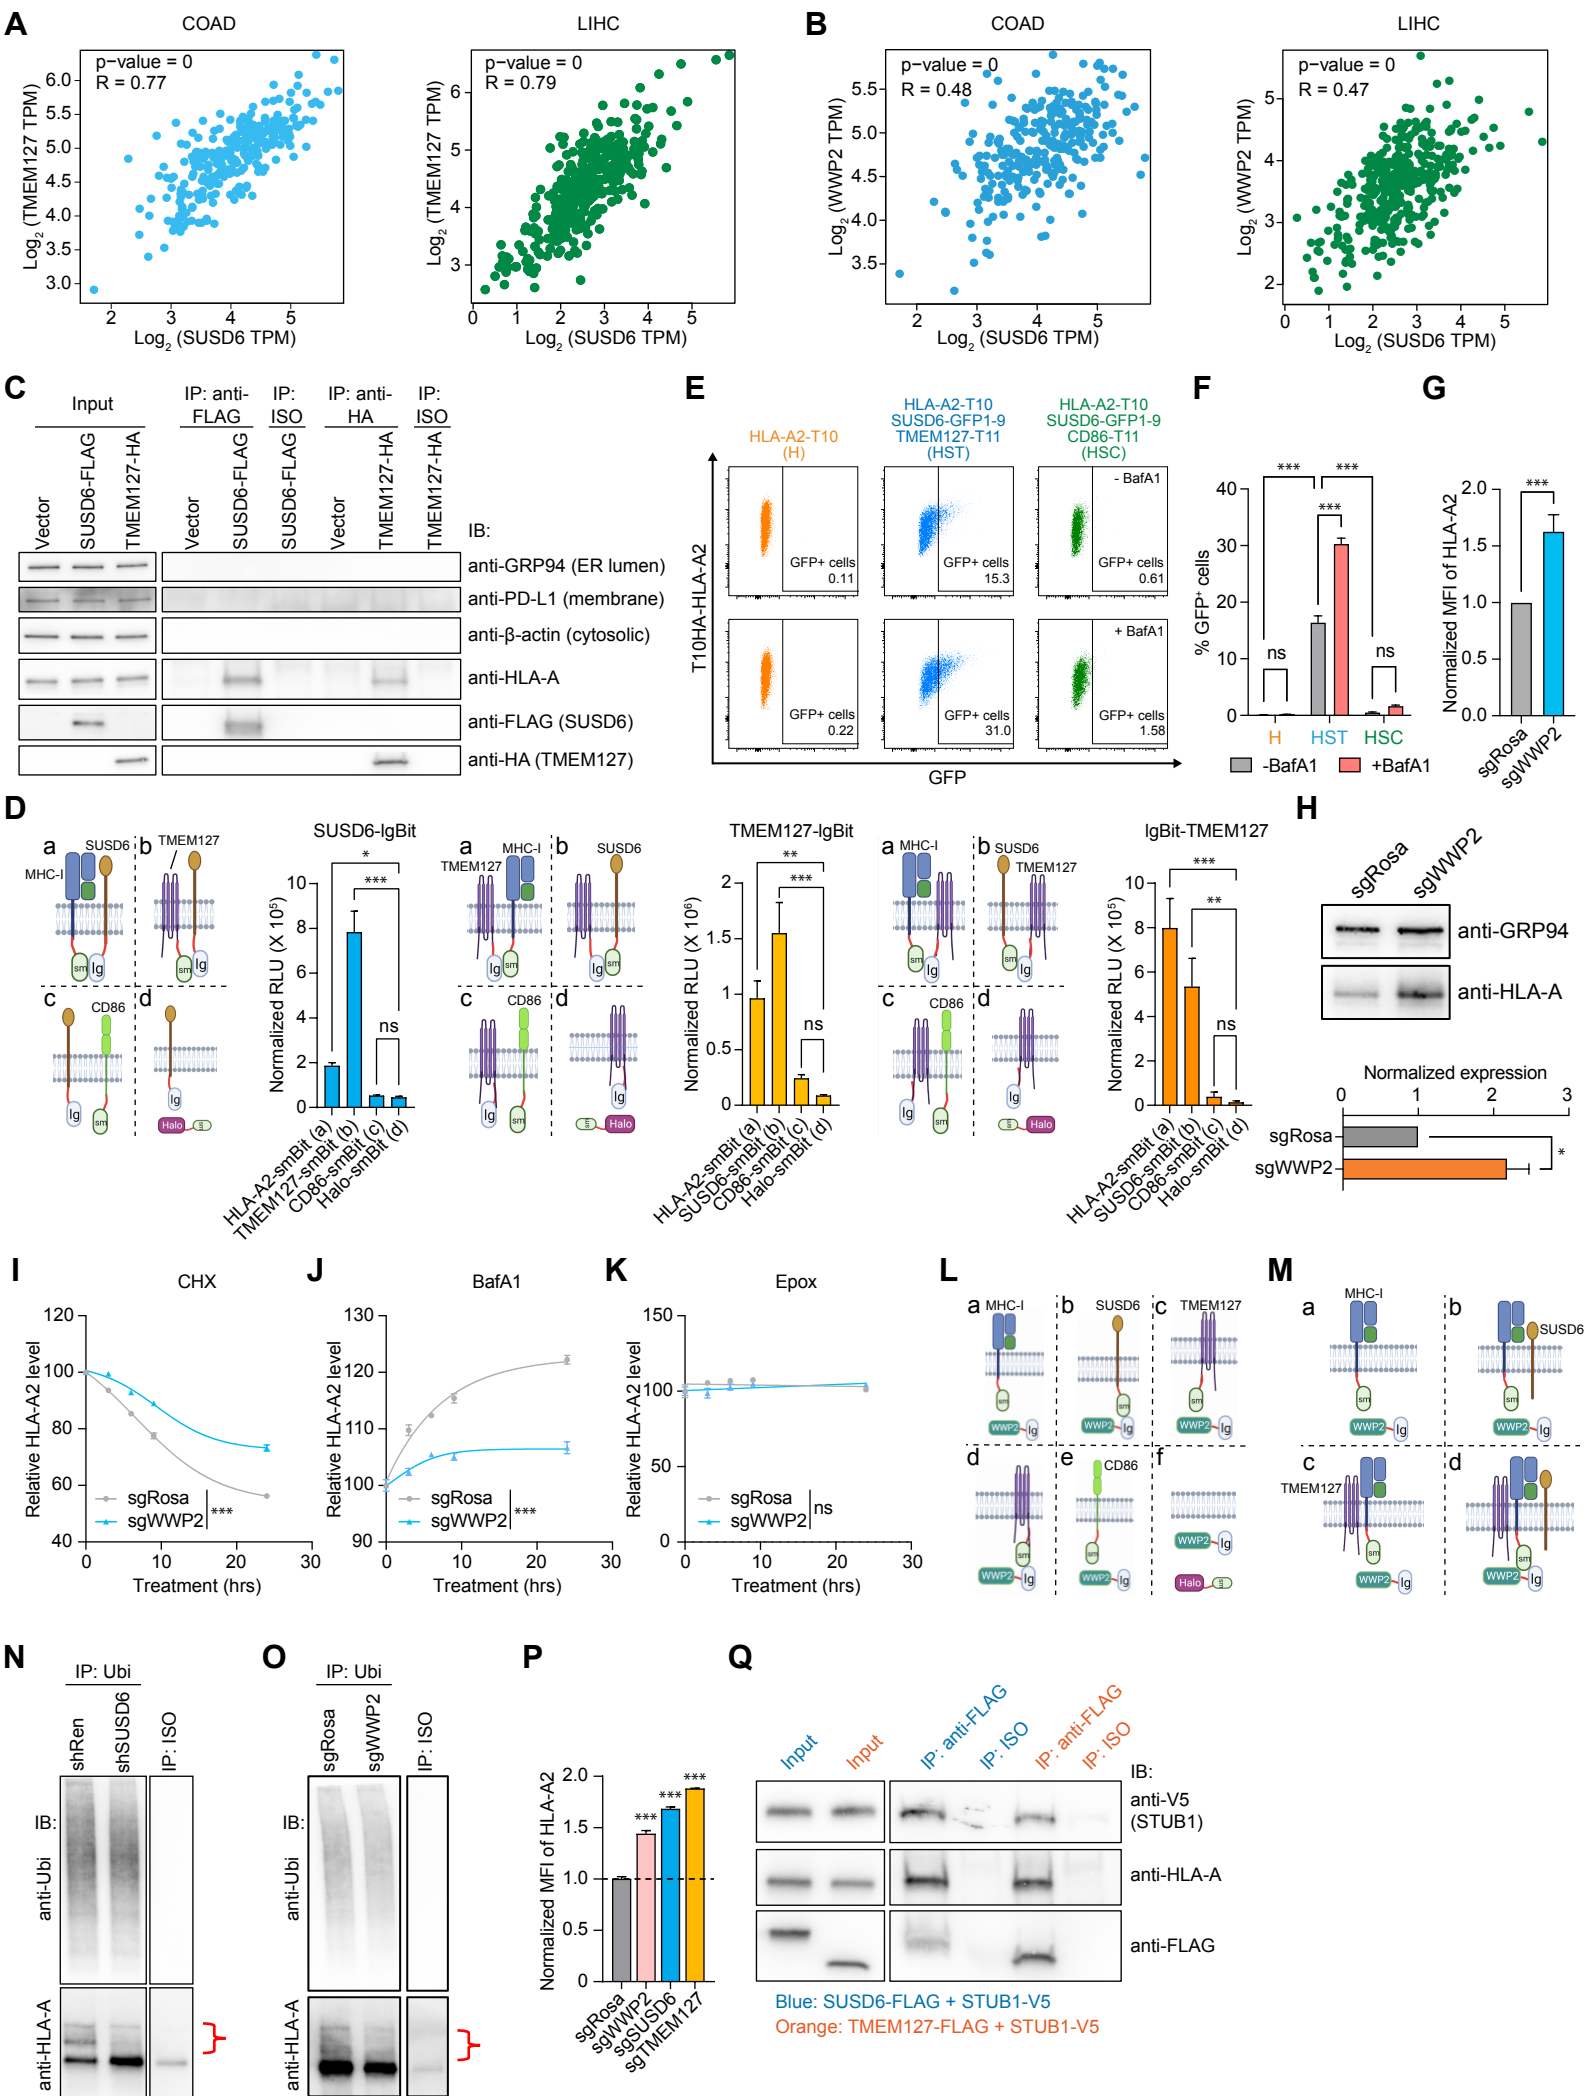

Supplement: NIHMS1965866-supplement-Fig_S6.pdf [file NIHMS1965866-supplement-Fig_S6.pdf]

Figure S7

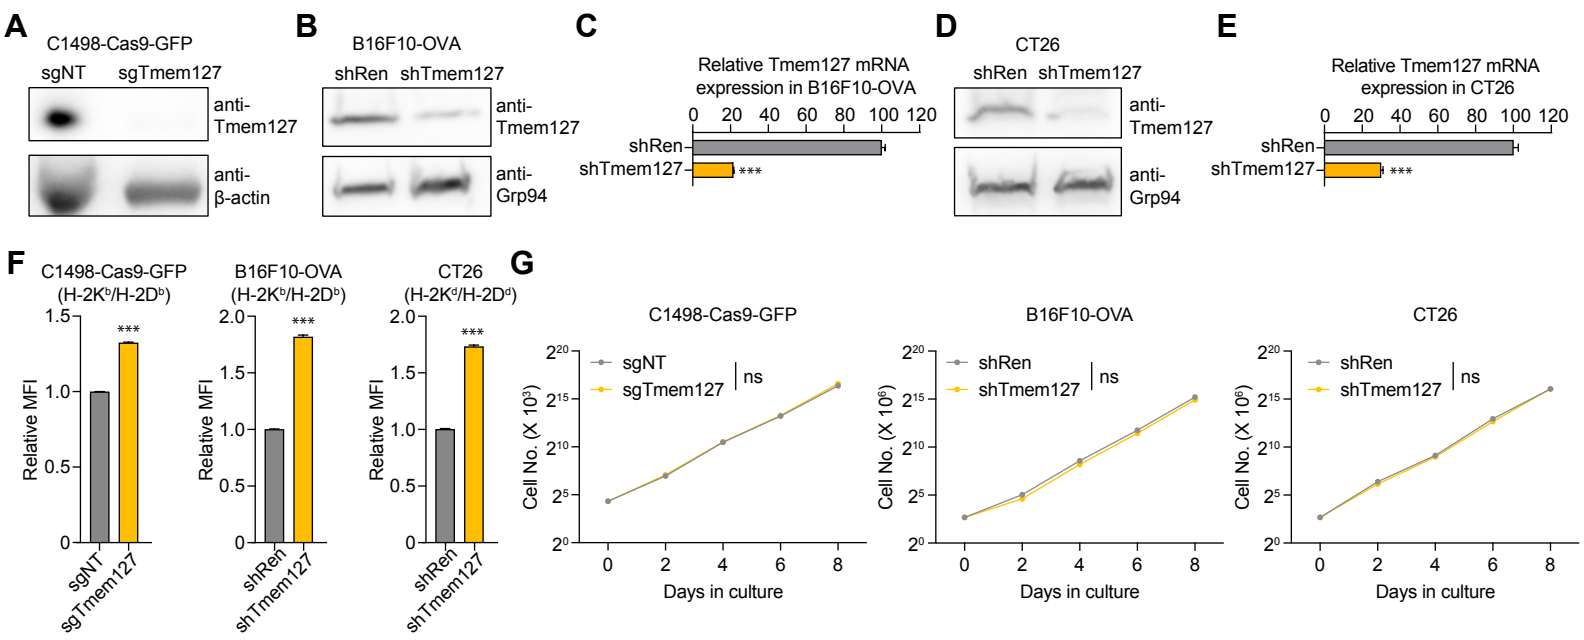

Supplement: NIHMS1965866-supplement-Fig_S7.pdf [file NIHMS1965866-supplement-Fig_S7.pdf]
